# Supplementary material for: Divide-and-Conquer Matrisome Protein (DC-MaP) Strategy: An MS-Friendly Approach to Proteomic Matrisome Characterization
Source: MDPI journal article supplement (doi:10.3390/ijms21239141), 2020-11-30
Supplement: s1 [file s1]

| Cellular component | Antibody             | Firm           | Reference | Dilution |
|--------------------|----------------------|----------------|-----------|----------|
| Membrane           | Integrin- $\beta$ 1* | Cell signaling | 9699      | 1/500    |
| Cytoskeleton       | Actin*               | Abcam          | ab8227    | 1/500    |
| Nucleus            | Histone*             | Millipore      | 09-838    | 1/1000   |
| ECM                | Fibronectin**        | Abcam          | ab2413    | 1/1000   |
|                    | Mimecan (OGN)*       | Thermo Fischer | PA5-48255 | 1/500    |

(\*) Secondary antibody was used at 1/10 000

(\*\*) Secondary antibody was used at 1/ 20 000

**Supplemental Data S1. Used antibodies and incubation conditions.**

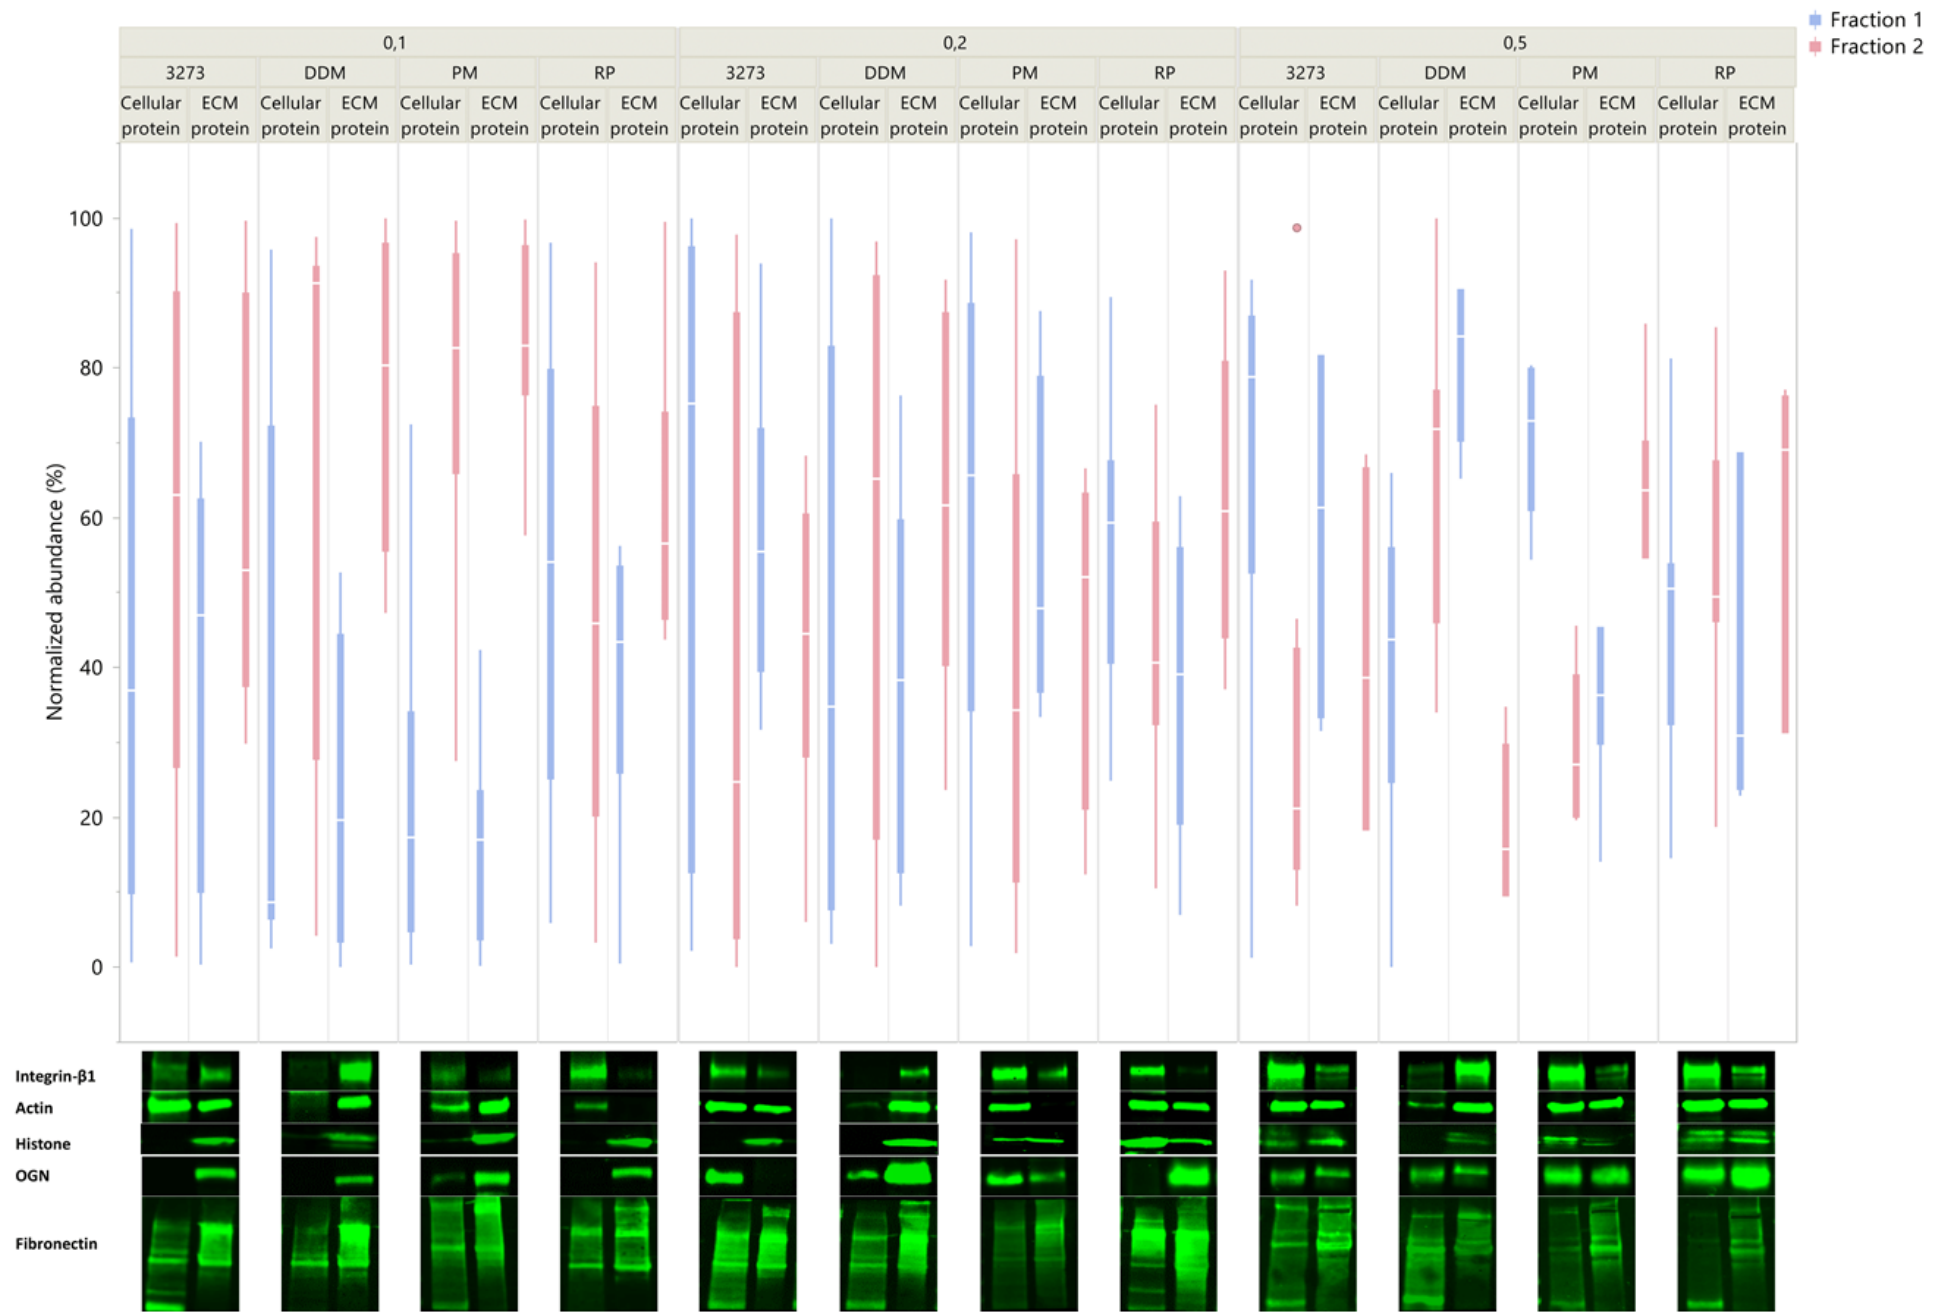

**Supplemental Data S2. Immunoblotting.** Densitometry results are expressed as a percentage of labeled proteins identified in each fraction. To enable reliable quantification of staining, all tested samples were also loaded in a parallel SDS-PAGE gel and labeled with PageBlue™ protein staining to allow densitometry normalization per total loaded protein.

A.

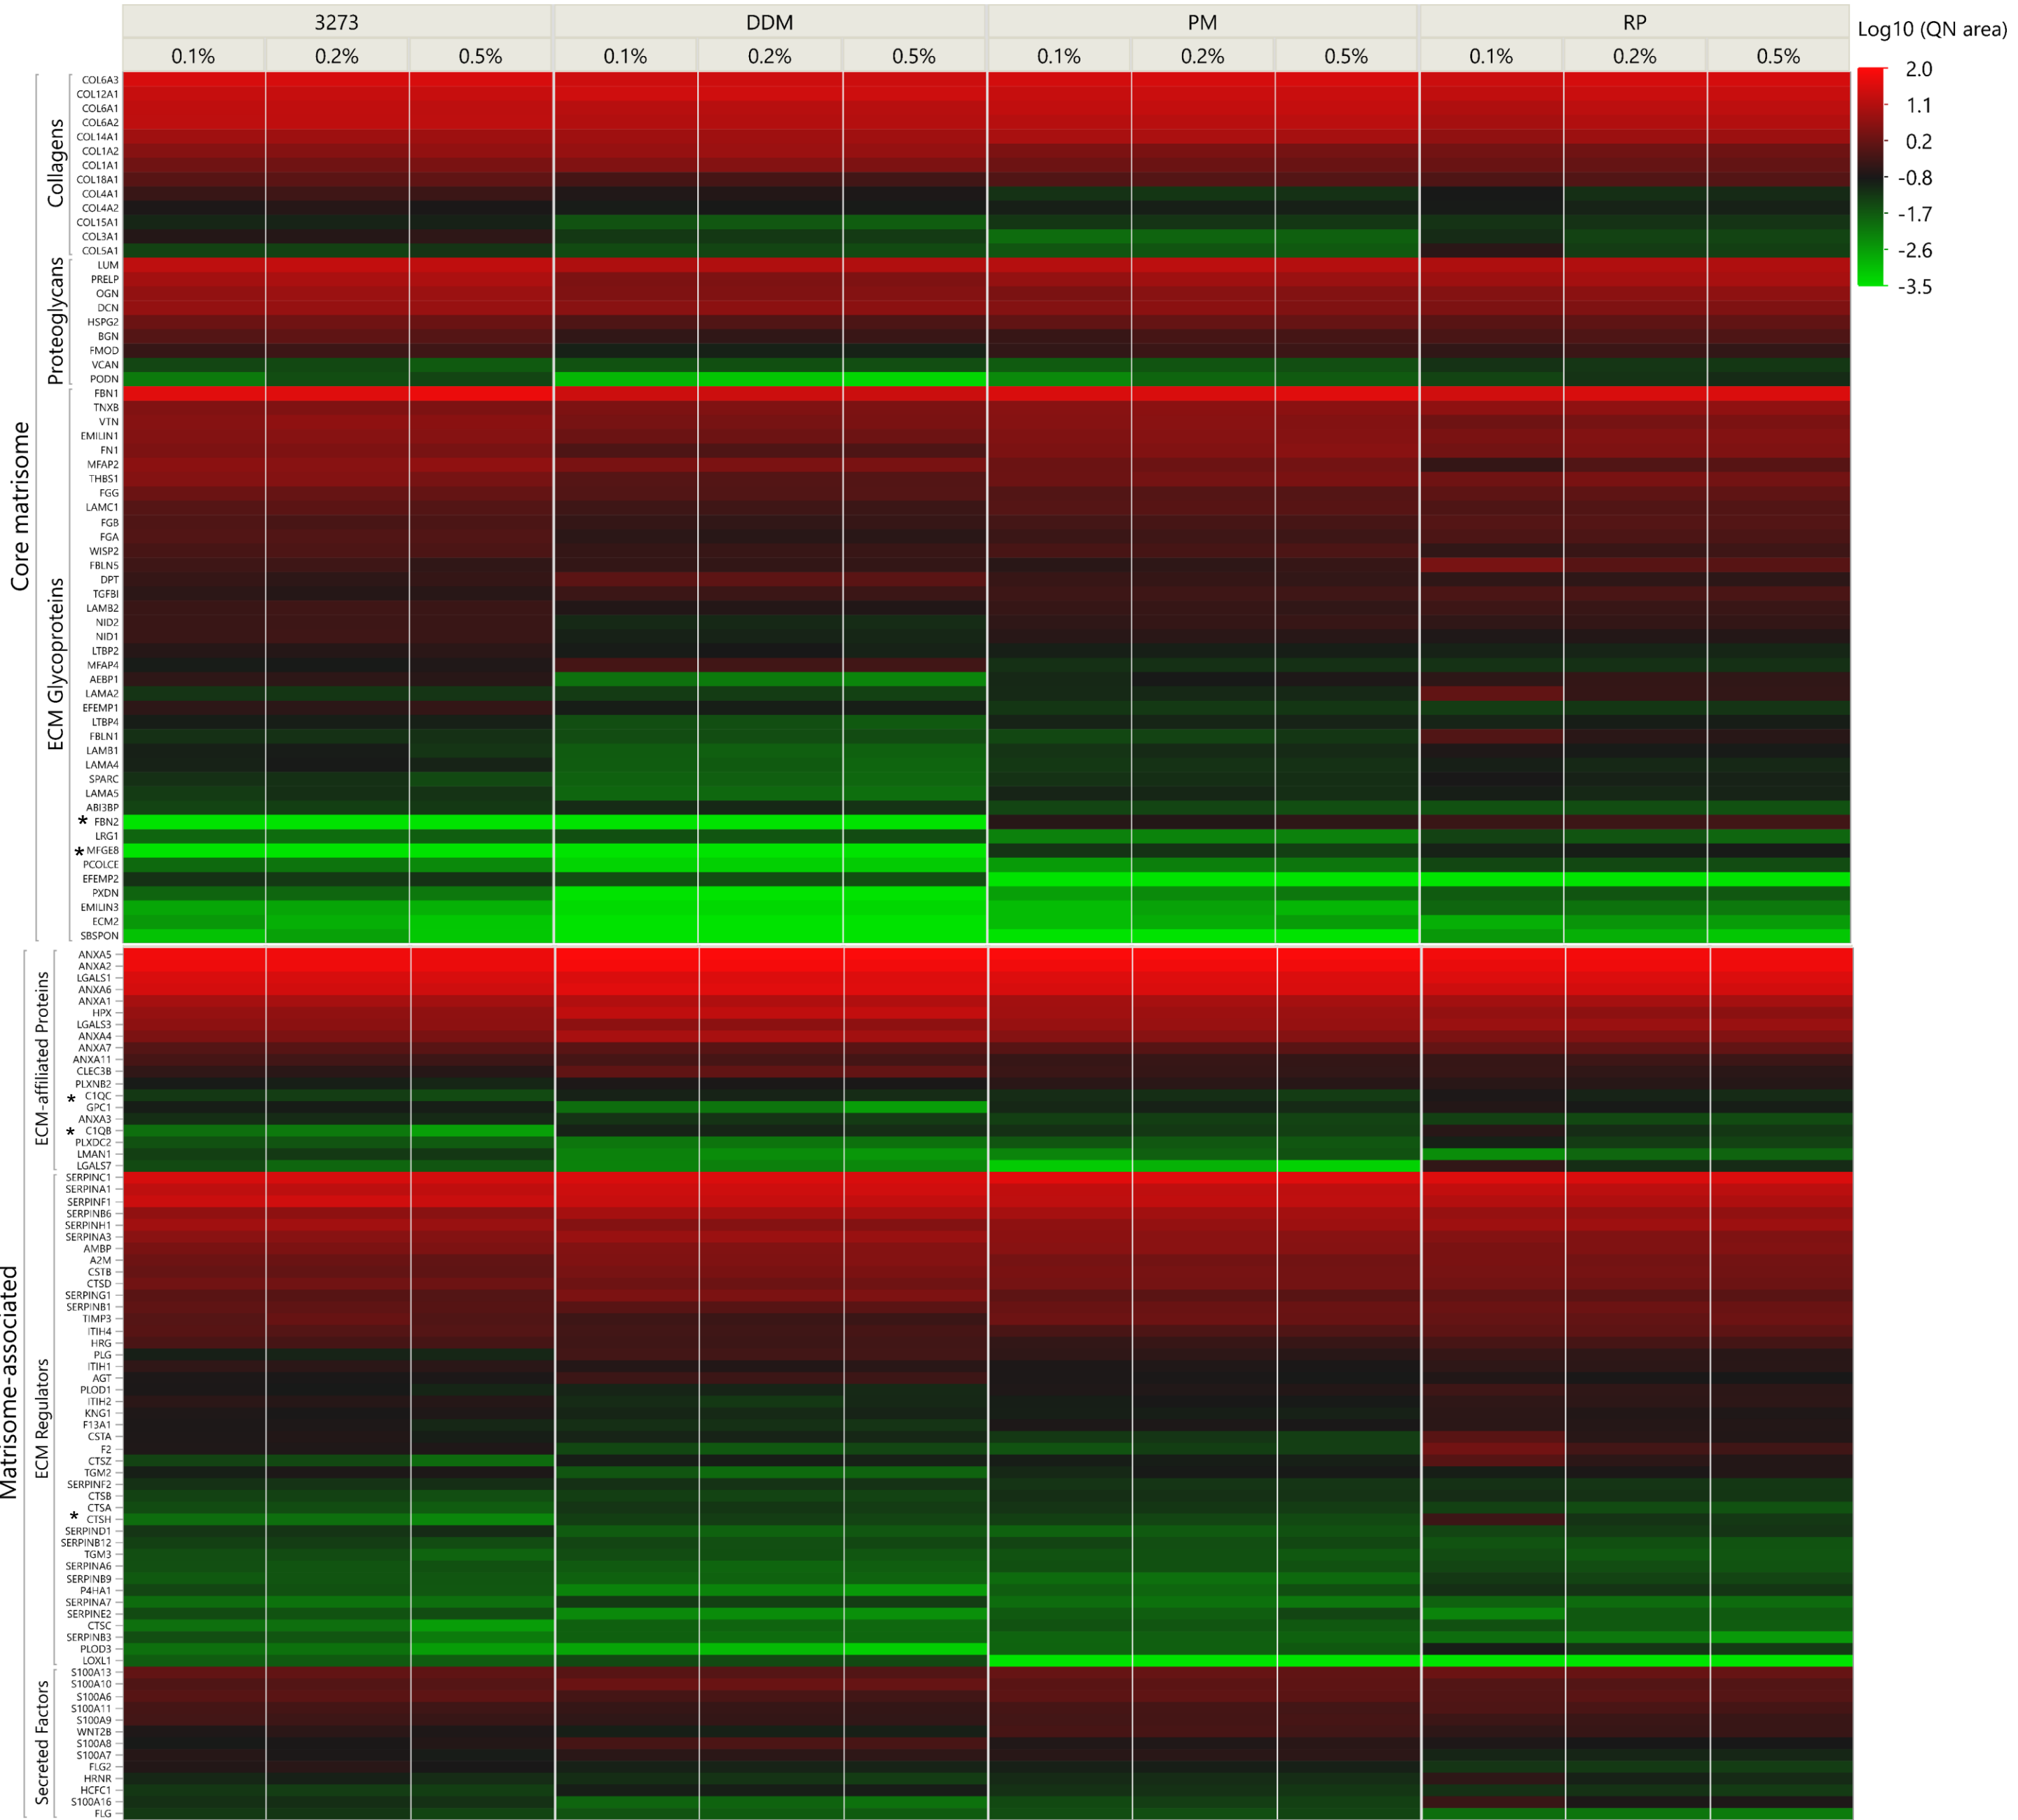

B.

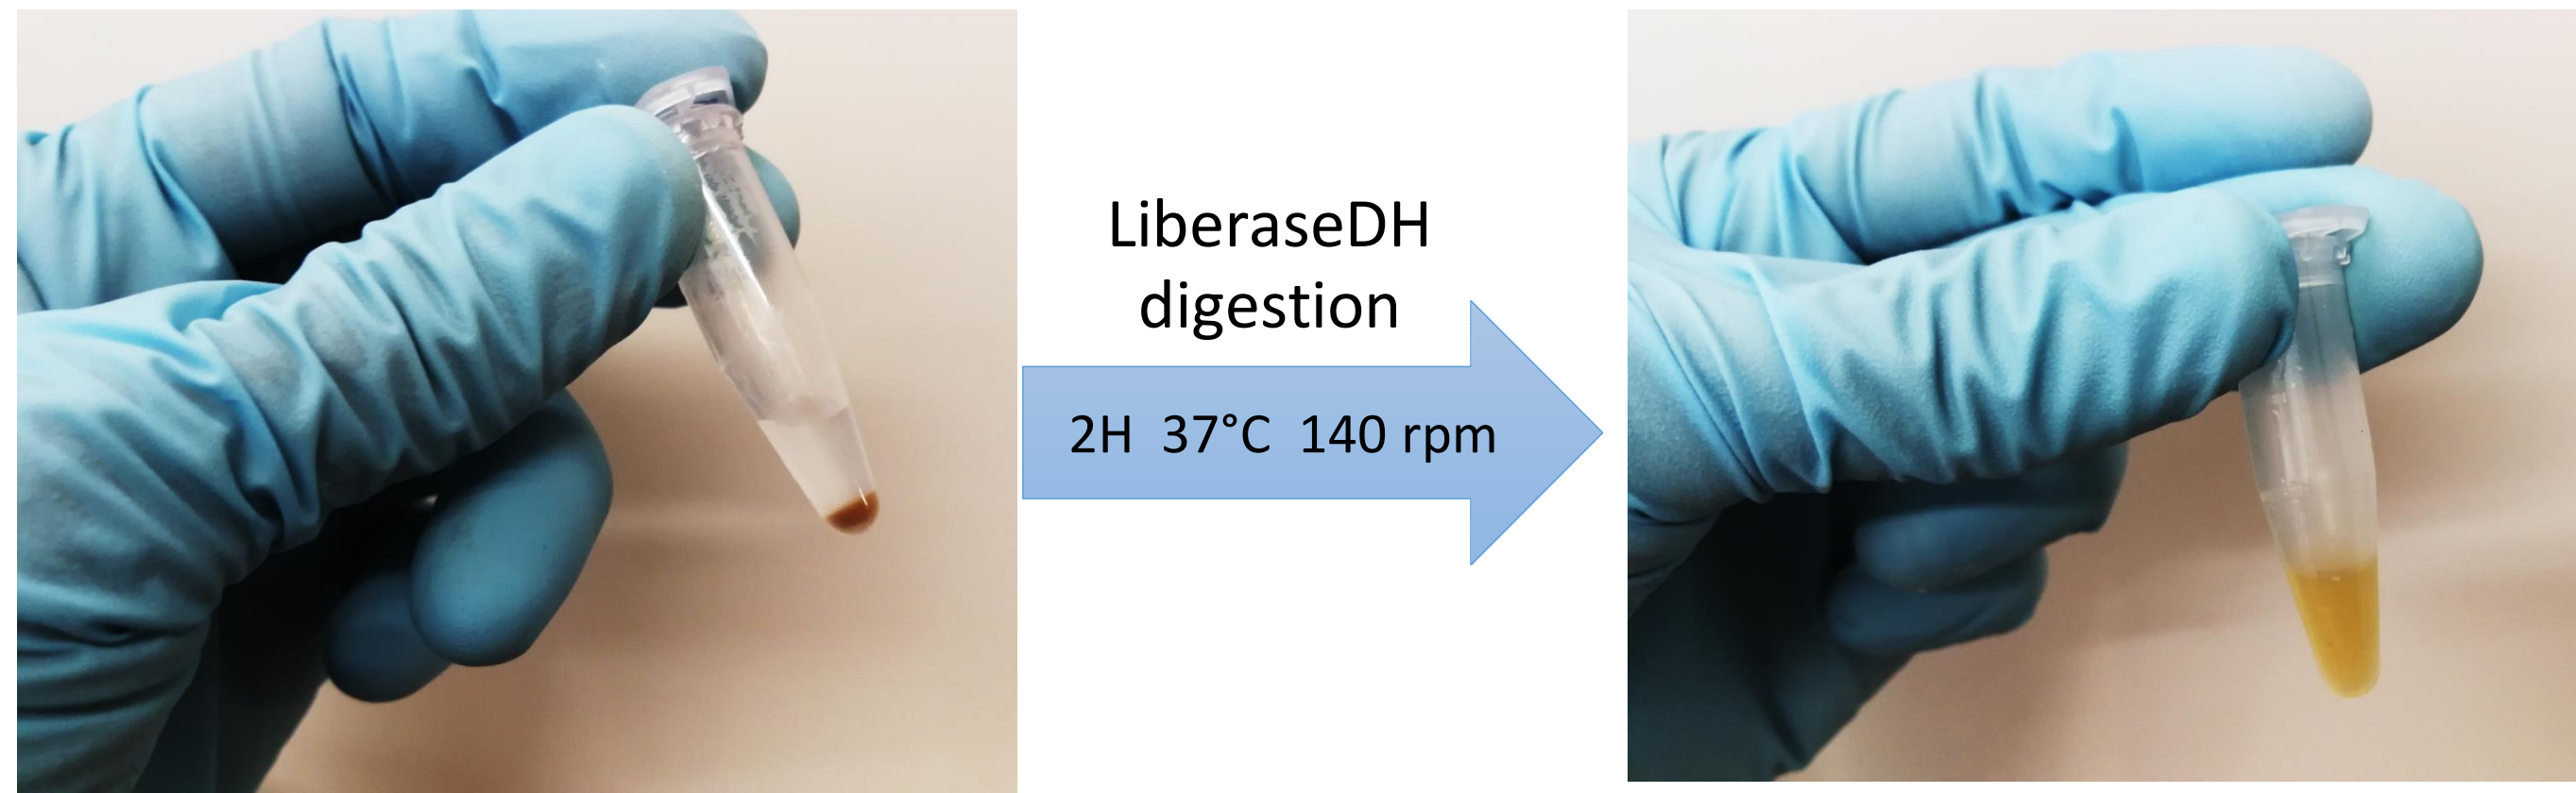

**Supplemental Data S3. Heat map of total matrisome protein abundance in fractions 1 and 2 combined.** A) Protein abundance expressed in XICs was normalized by quantile normalization and transformed to Log10. B) Pictures of fraction 2 (insoluble pellet) before and after Liberase DH digestion. Proteins cited in the text are labeled with asterisks.

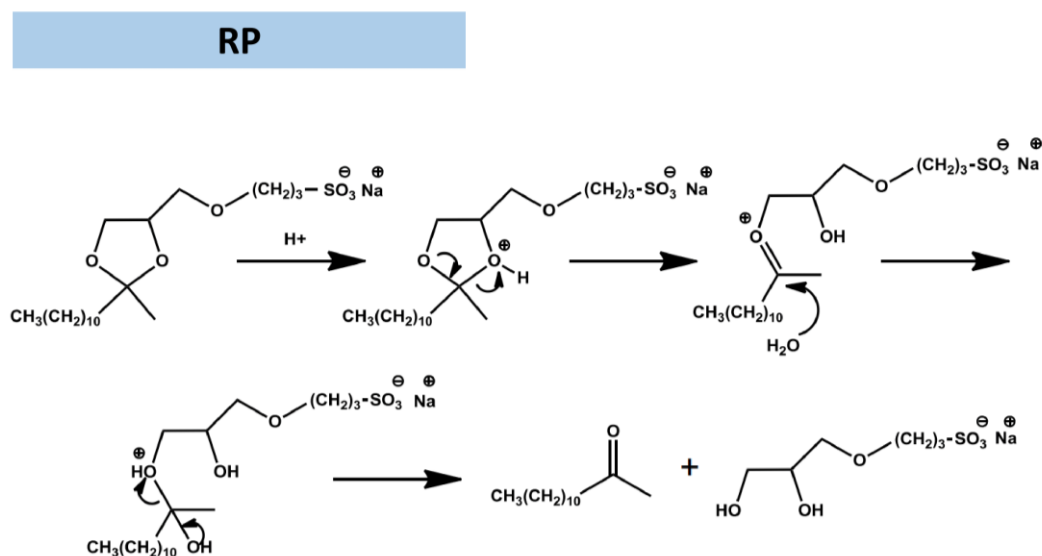

**PM (X=O) vs 3273 (X=S)**

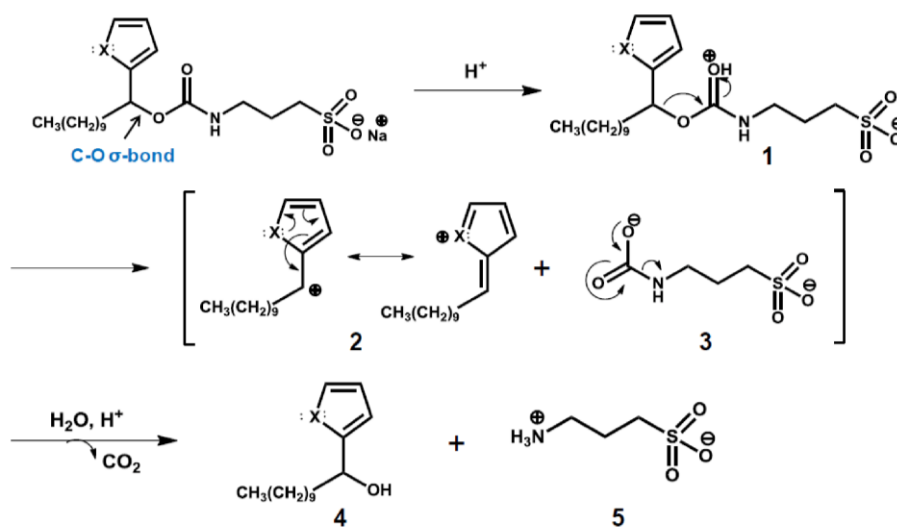

**Supplemental Data S4. Degradation mechanism of MS-compatible surfactants.** RP has a ketal functional group, which is susceptible to acid hydrolysis ( $\text{pH} < 5$ ). Acidification induces fragmentation of this functional group into a hydrophilic anionic molecule and a hydrophobic molecule ( $\text{CH}_3(\text{CH}_2)_{10}\text{COCH}_3$ ). PM and 3273 have similar molecular structures that differ only in their labile groups, which contain a furan ring ( $\text{X}=\text{O}$ ) and a thiophene ring ( $\text{X}=\text{S}$ ) respectively. Generally, at  $\text{pH} < 2$ , the carbonyl oxygen atom would

be protonated and lead to degradation of molecule 1. The furanyl group (X=O) is a better electron-donating group than the thiophene group (X=S) and, so cleavage of the C-O sigma bond will occur more quickly in PM. Subsequently, intermediate 3 undergoes decarboxylation (loss of carbon dioxide (CO<sub>2</sub>)). This provides a strong driving force for degradation of the surfactant into CO<sub>2</sub> and a zwitterionic species (3-ammoniopropane-1-sulfonate) (molecule 5). Intermediate 2 then undergoes addition of water, producing an alcohol 4. It is therefore expected that PM will degrade more easily into CO<sub>2</sub>, R-OH (molecule 4) and a small zwitterionic species (molecule 5) due to its furan ring compared to 3273, which contains a thiophene ring (10).

| Surfactant | Type      | CMC (%)<br>T° 20-25°C |
|------------|-----------|-----------------------|
| SDS        | Anionic   | 0.030                 |
| 3273       | Anionic   | 0.007                 |
| DDM        | Non-ionic | 0.009                 |
| PM         | Anionic   | >0.1                  |
| RP         | Anionic   | 0.064                 |

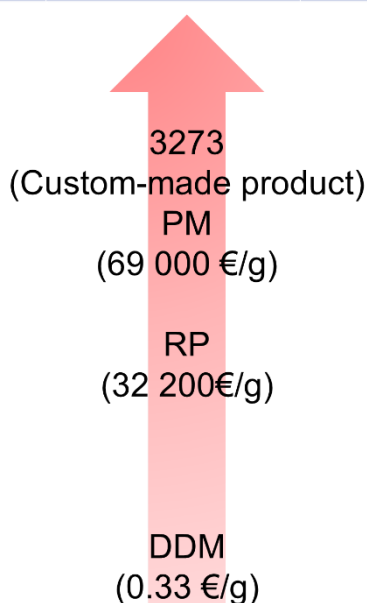

**Supplemental Data S5. Surfactant properties and costs.**

**Supplemental Table S1. Table of results as a sum of all fractions.**

**Supplemental Table S2. Tables of protein quantification in all tested conditions.**
